# Supplementary material
Source: PubMed Central journal article supplement (PMC3845179)
Supplement: 1319502110_pnas.201319502SI.pdf [file 1319502110_pnas.201319502SI.pdf]

# Supporting Information

Li and Ravetch 10.1073/pnas.1319502110

## SI Materials and Methods

**Mice.** Wild-type C57BL/6 mice were purchased from Taconic. Mice carrying the floxed *Fcgr2b* allele (*Fcgr2b<sup>fl</sup>*) were generated from B6 ES cells using a previously described *Fcgr2b* conditional knockout targeting vector (1). *Fcgr2b<sup>fl/fl</sup>Mb1Cre<sup>+</sup>*, *Fcgr2b<sup>fl/fl</sup>CD11cCre<sup>+</sup>*, and *Fcgr2b<sup>fl/fl</sup>LysMCre<sup>+</sup>* mice were generated by crossing mice carrying *Fcgr2b<sup>fl</sup>* alleles to Mb1-Cre mice (2), CD11c-Cre mice (3), and LysM-Cre mice (4), respectively, which have been backcrossed to the B6 background at least 10 times. *Fcgr2b* homozygous knockout mice (*Fcgr2b<sup>-/-</sup>*) were generated by crossing mice carrying floxed *Fcgr2b* alleles to Cag-Cre mice on a pure B6 background (5). *Fcgr2b* homozygous knockout mice backcrossed to a BALB/c background have been previously described (6). *Cd40<sup>-/-</sup>* mice (B6.129P2-Cd40tm1Kik/J) were obtained from The Jackson Laboratory, and were crossed to human (*h*)*FCGR2B* transgenic mice (1) to generate *Cd40<sup>-/-</sup>hFCGR2B<sup>+</sup>* and *Cd40<sup>-/-</sup>hFCGR2B<sup>-</sup>* mice. *Ship* knockout mice have been described previously (7). All mice were maintained in The Rockefeller University Comparative Bioscience Center. All experiments were performed in compliance with federal laws and institutional guidelines and had been approved by The Rockefeller University Institutional Animal Care and Use Committee.

**Antibodies.** Agonistic anti-mouse CD40 antibodies, including 1C10 and 1C10-derived  $\alpha$ CD40:mIgG1,  $\alpha$ CD40:mIgG1(D265A), and  $\alpha$ CD40:hIgG1(S267E); agonistic  $\alpha$ DR5 antibody clone MD5-1 have all been described previously (8, 9). Agonistic  $\alpha$ Fas antibody (clone Jo2) was purchased from BD Biosciences. Ly17.2 and 2B6 have been described previously (10, 11). Other antibodies used for flow cytometry analysis were purchased from BD Biosciences or BioLegend.

**Agonistic  $\alpha$ CD40 Antibody-Induced B-Cell Activation.** *CD45.1<sup>+</sup>* 5-(6)-carboxyfluorescein diacetate succinimidyl diester (CFSE)-labeled WT or *CD45.2<sup>+</sup> Fcgr2b<sup>-/-</sup>* splenocytes were adoptively transferred into WT C57BL/6 or *Fcgr2b<sup>-/-</sup>* recipient mice that express different CD45 congenic markers on day -1. Recipient mice were then treated with 30  $\mu$ g of agonistic  $\alpha$ CD40 antibody ( $\alpha$ CD40:mIgG1) or inactive control  $\alpha$ CD40 antibody ( $\alpha$ CD40:D265A) on day 0. On day 3, blood cells were stained with fluorescence-conjugated antibodies against CD45.2 (104), CD45.1 (A20), B220 (RA3-6B2), or CD80 (16-10A1). CD80 levels were analyzed in host and transferred B cells (B220<sup>+</sup>) identified based on CFSE and CD45 expression. On day 5, CFSE levels were analyzed in transferred B cells in spleen.

**OVA-Specific T-Cell Response.** Mice were i.p. injected with 5  $\mu$ g of DEC-OVA in the presence of 30  $\mu$ g of  $\alpha$ CD40 antibodies (clone 1C10) or 1C10-derived  $\alpha$ CD40 antibody  $\alpha$ CD40:hIgG1(S267E). Seven days later, blood cells or splenocytes were depleted for erythrocytes and analyzed for OVA-specific CD8<sup>+</sup> T cells by OVA peptide SIINFELK H-2<sup>b</sup> tetramer staining as described previously (8). Briefly, cells resuspended in FACS buffer (PBS with 0.5% FBS, 2 mM EDTA, and 0.1% NaN<sub>3</sub>) were stained with FITC-conjugated  $\alpha$ CD4 (RM4-5), allophycocyanin-conjugated  $\alpha$ CD8 $\alpha$  (53.67) antibodies, and phycoerythrin-conjugated OVA peptide SIINFELK H-2<sup>b</sup> tetramer (tet-OVA; Beckman Coulter) on ice for 1 h, and analyzed by FACSCalibur after a wash. 7AAD was included to exclude dead cells. In the bone marrow chimeric experiment, 10<sup>6</sup> bone marrow cells isolated from *Cd40<sup>-/-</sup>hFCGR2B<sup>+</sup>*, *Cd40<sup>-/-</sup>hFCGR2B<sup>-</sup>*, or *Cd40<sup>-/-</sup>hFCGR2B<sup>+</sup>* mice or 10<sup>6</sup> 1:1 mixed *Cd40<sup>-/-</sup>hFCGR2B<sup>-</sup>* and *Cd40<sup>-/-</sup>hFCGR2B<sup>+</sup>* bone marrow

cells were transferred by i.v. injection into lethally irradiated (900 rad) WT C57BL/6 recipient mice. Three months later, mice were i.p. injected with 5  $\mu$ g of DEC-OVA and 30  $\mu$ g of  $\alpha$ DR5:hIgG1 (S267E). Seven days later, blood cells were depleted for erythrocytes and analyzed for OVA-specific CD8<sup>+</sup> T cells by OVA peptide SIINFELK H-2<sup>b</sup> tetramer staining.

**MC38 Tumor Model.** MC38 colon carcinoma cells (kindly provided by Mark J. Smyth, Peter MacCallum Cancer Centre, East Melbourne) have been described previously (9) and were cultured in DMEM with 10% (vol/vol) FBS and 1% pen/strep (Invitrogen). To establish MC38, 10<sup>6</sup> cells were implanted s.c. After 5–7 d, mice with palpable tumors were treated with 100  $\mu$ g per mouse of control hamster IgG or  $\alpha$ DR5 antibodies (clone MD5-1) i.v. three times at 4-d intervals as described previously (9). Tumor areas were measured once every 4 d and calculated as  $\pi ab/4$ , where “a” and “b” are width and length, respectively.

**IIA1.6 and IIA1.6-Derived B-Cell Lymphoma Models.** IIA1.6 and IIA1.6-derived cells that express either unmutated Fc $\gamma$ RIIB (IIA1.6-Fc $\gamma$ RIIB) or mutant Fc $\gamma$ RIIB that contains a Y $\rightarrow$ F mutation in the immunoreceptor tyrosine-based inhibitory motif (ITIM) [IIA1.6-Fc $\gamma$ RIIB(Y $\rightarrow$ F)] were described previously (12). Fc $\gamma$ RIIB expression was verified on the protein level by FACS using ly17.2 antibody and on the mRNA level by cDNA sequencing. In order to test the antitumor activity of agonistic  $\alpha$ CD40 antibody (clone 1C10),  $2.5 \times 10^7$  IIA1.6 or IIA1.6-derived cells were injected i.v. into WT or *Fcgr2b*-deficient (*Fcgr2b<sup>-/-</sup>*) BALB/c mice, which were treated with 200  $\mu$ g of 1C10 on days 7 and 10, and monitored for survival.

**EL4 and EL4-Derived T-Cell Lymphoma Models.** EL4 cells were obtained from ATCC and cultured in RPMI with 10% FBS and 1% pen/strep (Invitrogen). To generate EL4 cells expressing unmutated or truncated human Fc $\gamma$ RIIB, human Fc $\gamma$ RIIB cDNA (isoform 1) was cloned from hFCGR2B transgenic mice, and a pFB-Neo retroviral vector (Stratagene) expressing unmutated human Fc $\gamma$ RIIB was constructed. A mutated version of this retroviral vector was constructed by mutagenesis using primers 5'-GTA GTG GCC TTG ATC TAG TGC AGG AAA AAG CGG-3' and 5'-CCG CTT TTT CCT GCA CTA GAT CAA GGC CAC TAC-3' to introduce a nonsense mutation at position Y246 of human Fc $\gamma$ RIIB. EL4 cells were transduced with retroviruses carrying these constructs and selected with 0.2 mg/mL of Geneticin (Invitrogen). The resulting Geneticin-resistant cells that express WT and truncated hFc $\gamma$ RIIB are referred to as EL4-hFc $\gamma$ RIIB and EL4-hFc $\gamma$ RIIB( $\Delta$ C), respectively. In order to test the antitumor activity of human Fc $\gamma$ RIIB-enhanced agonistic  $\alpha$ CD40 antibody  $\alpha$ CD40:hIgG1(S267E),  $\sim 1.5 \times 10^7$  EL4, EL4-hFc $\gamma$ RIIB, or EL4-hFc $\gamma$ RIIB( $\Delta$ C) cells were injected i.v. into WT C57BL/6 mice, which were then treated with 200  $\mu$ g of  $\alpha$ CD40:hIgG1(S267E) or human control IgG on days 3 and 5, and monitored for survival.

**Hepatotoxicity.** To study the hepatotoxic effects of MD5-1 antibody, mice were treated with four doses of 300  $\mu$ g of MD5-1 antibodies i.v. at 3-d intervals, and monitored for survival over 2 mo. Before and 13 d after the initial MD5-1 treatment, serum alanine aminotransferase (ALT) levels were analyzed using the MaxDiscovery Enzymatic Assay Kit (Bioo Scientific) following the manufacturer's instructions. To study agonistic  $\alpha$ Fas antibodies, WT C57BL/6, *Fcgr2b<sup>-/-</sup>*, *Fcgr2b<sup>+/-</sup>*, and *Ship<sup>-/-</sup>* mice were treated with 10  $\mu$ g of  $\alpha$ Fas antibodies (clone Jo2) and monitored for survival.

**Statistics.** All statistical analyses were performed in GraphPad Prism 5 for Windows. When two groups were compared (hamIgG vs. MD5-1 in Fig. 4 B–F), a two-tailed *t* test was used. When more than two groups were compared, a one-way ANOVA with a

Dunnett post hoc test was used in Fig. 4A to compare all groups with the *Fcgr2b<sup>fl/fl</sup>* control group; a one-way ANOVA with a Tukey post hoc test was used in Figs. 1 E and F, 2A, and 5A. A log-rank test was used in Fig. 3.

- Smith P, DiLillo DJ, Bournazos S, Li F, Ravetch JV (2012) Mouse model recapitulating human Fcγ receptor structural and functional diversity. *Proc Natl Acad Sci USA* 109(16):6181–6186.
- Hobeika E, et al. (2006) Testing gene function early in the B cell lineage in mb1-cre mice. *Proc Natl Acad Sci USA* 103(37):13789–13794.
- Caton ML, Smith-Raska MR, Reizis B (2007) Notch–RBP-J signaling controls the homeostasis of CD8<sup>−</sup> dendritic cells in the spleen. *J Exp Med* 204(7):1653–1664.
- Clausen BE, Burkhardt C, Reith W, Renkawitz R, Förster I (1999) Conditional gene targeting in macrophages and granulocytes using LysMcre mice. *Transgenic Res* 8(4): 265–277.
- Sakai K, Miyazaki J-i (1997) A transgenic mouse line that retains Cre recombinase activity in mature oocytes irrespective of the cre transgene transmission. *Biochem Biophys Res Commun* 237(2):318–324.
- Bolland S, Ravetch JV (2000) Spontaneous autoimmune disease in Fc(gamma)RIIB-deficient mice results from strain-specific epistasis. *Immunity* 13(2):277–285.
- Helgason CD, et al. (1998) Targeted disruption of SHIP leads to hemopoietic perturbations, lung pathology, and a shortened life span. *Genes Dev* 12(11):1610–1620.
- Li F, Ravetch JV (2011) Inhibitory Fcγ receptor engagement drives adjuvant and anti-tumor activities of agonistic CD40 antibodies. *Science* 333(6045):1030–1034.
- Li F, Ravetch JV (2012) Apoptotic and antitumor activity of death receptor antibodies require inhibitory Fcγ receptor engagement. *Proc Natl Acad Sci USA* 109(27):10966–10971.
- Holmes KL, Palfree RG, Hammerling U, Morse HC III (1985) Alleles of the Ly-17 alloantigen define polymorphisms of the murine IgG Fc receptor. *Proc Natl Acad Sci USA* 82(22):7706–7710.
- Dhodapkar KM, et al. (2007) Selective blockade of the inhibitory Fcγ receptor (FcγRIIB) in human dendritic cells and monocytes induces a type I interferon response program. *J Exp Med* 204(6):1359–1369.
- Muta T, et al. (1994) A 13-amino-acid motif in the cytoplasmic domain of Fc gamma RIIB modulates B-cell receptor signalling. *Nature* 369(6478):340.

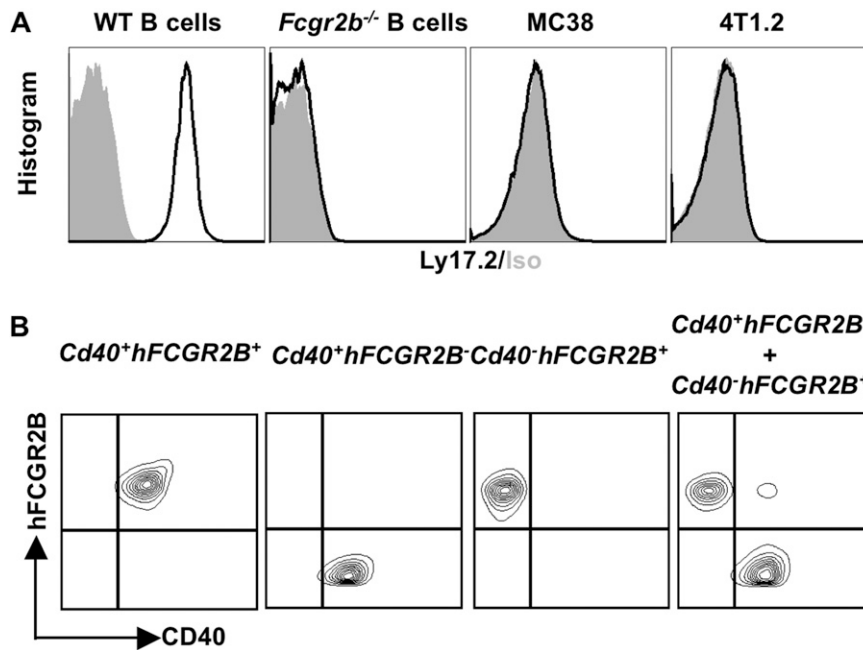

**Fig. 51.** (A) MC38 and 4T1.2 tumor cells do not express FcγRIIB. To analyze FcγRIIB expression levels, cells were stained with fluorescence-conjugated Ly17.2 or isotype control antibodies and analyzed by FACS. Presented are histogram profiles. (B) Expression of CD40 and human FcγRIIB in B cells of WT C57BL/6 recipient mice reconstituted with bone marrow cells isolated from either *Cd40<sup>+</sup>hFCGR2B<sup>+</sup>*, *Cd40<sup>+</sup>hFCGR2B<sup>-</sup>*, or *Cd40<sup>-</sup>hFCGR2B<sup>+</sup>* mice or 1:1 mixed *Cd40<sup>+</sup>hFCGR2B<sup>-</sup>* and *Cd40<sup>-</sup>hFCGR2B<sup>+</sup>* mice.

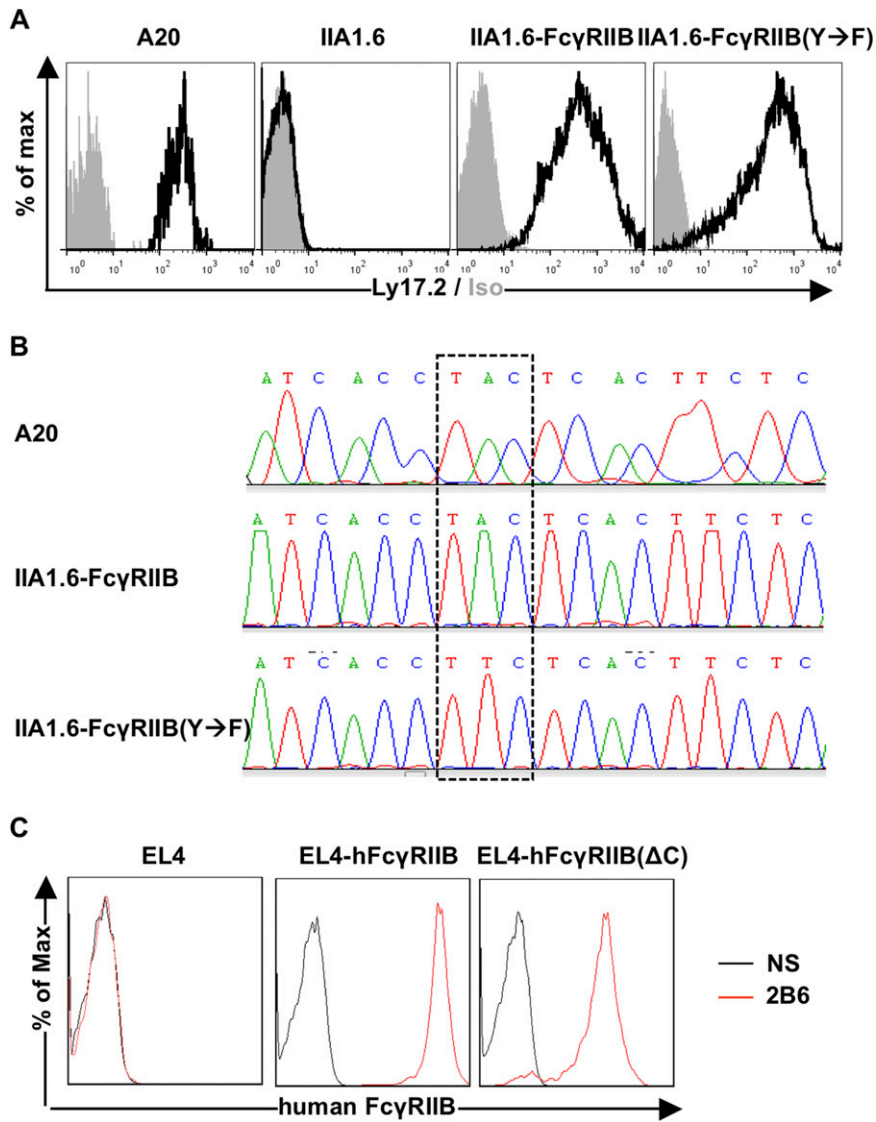

**Fig. S2.** (A and B) Expression of FcγRIIB in IIA1.6-derived cell lines. (A) Histogram profiles showing the expression of FcγRIIB analyzed by FACS using Ly17.2 antibodies in A20 (the FcγRIIB<sup>+</sup> parental cell line of IIA1.6), IIA1.6, IIA1.6-FcγRIIB (IIA1.6 cells expressing unmutated FcγRIIB), and IIA1.6-FcγRIIB(Y→F) cells (IIA1.6 cells expressing FcγRIIB with a Y→F mutation in the ITIM). (B) Sequencing results of *Fcgr2b* cDNA prepared from the indicated cells. The coding sequences for the conserved ITIM tyrosine are boxed. (C) Expression of human FcγRIIB in EL4-derived cell lines. Human FcγRIIB expression was analyzed in EL4, EL4-hFcγRIIB (EL4 cells expressing human FcγRIIB), and EL4-FcγRIIB(ΔC) cells (EL4 cells expressing truncated human FcγRIIB without the cytoplasmic domain) by FACS using 2B6 antibodies (mouse anti-human FcγRIIB). Histogram profiles are presented. NS, no staining.

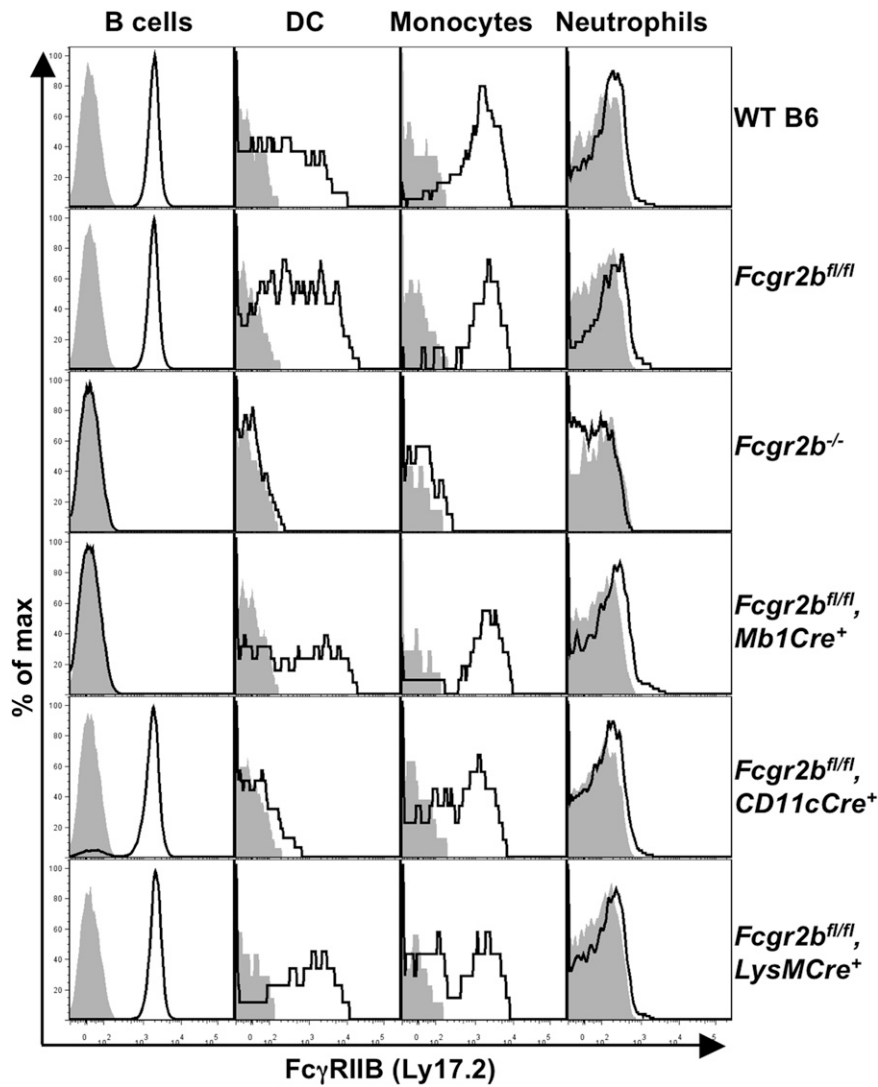

**Fig. 53.** Expression profiles of Fc $\gamma$ RIIB in WT and mutant mice with germ-line or conditional knockout of *Fcgr2b*. Histogram profiles showing the expression of Fc $\gamma$ RIIB in the indicated cell types of the indicated mice. Fc $\gamma$ RIIB levels were analyzed in B cells (CD19<sup>+</sup>), monocytes (CD11b<sup>+</sup>NK1.1<sup>-</sup>Gr1<sup>low/-</sup>SSC<sup>low</sup>), and neutrophils (CD11b<sup>+</sup>NK1.1<sup>-</sup>Gr1<sup>high</sup>SSC<sup>int</sup>) in the peripheral blood and dendritic cells (DC; CD11c<sup>high</sup>) in spleen.

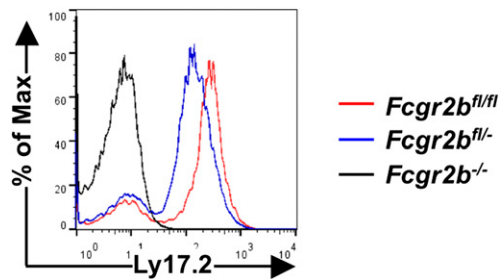

**Fig. 54.** Reduced expression of Fc $\gamma$ RIIB in heterozygous *Fcgr2b* knockout mice. Histogram profiles showing the expression of Fc $\gamma$ RIIB in splenocytes isolated from wild-type mice and heterozygous and homozygous *Fcgr2b* knockout mice, analyzed by FACS using Ly17.2 antibodies.

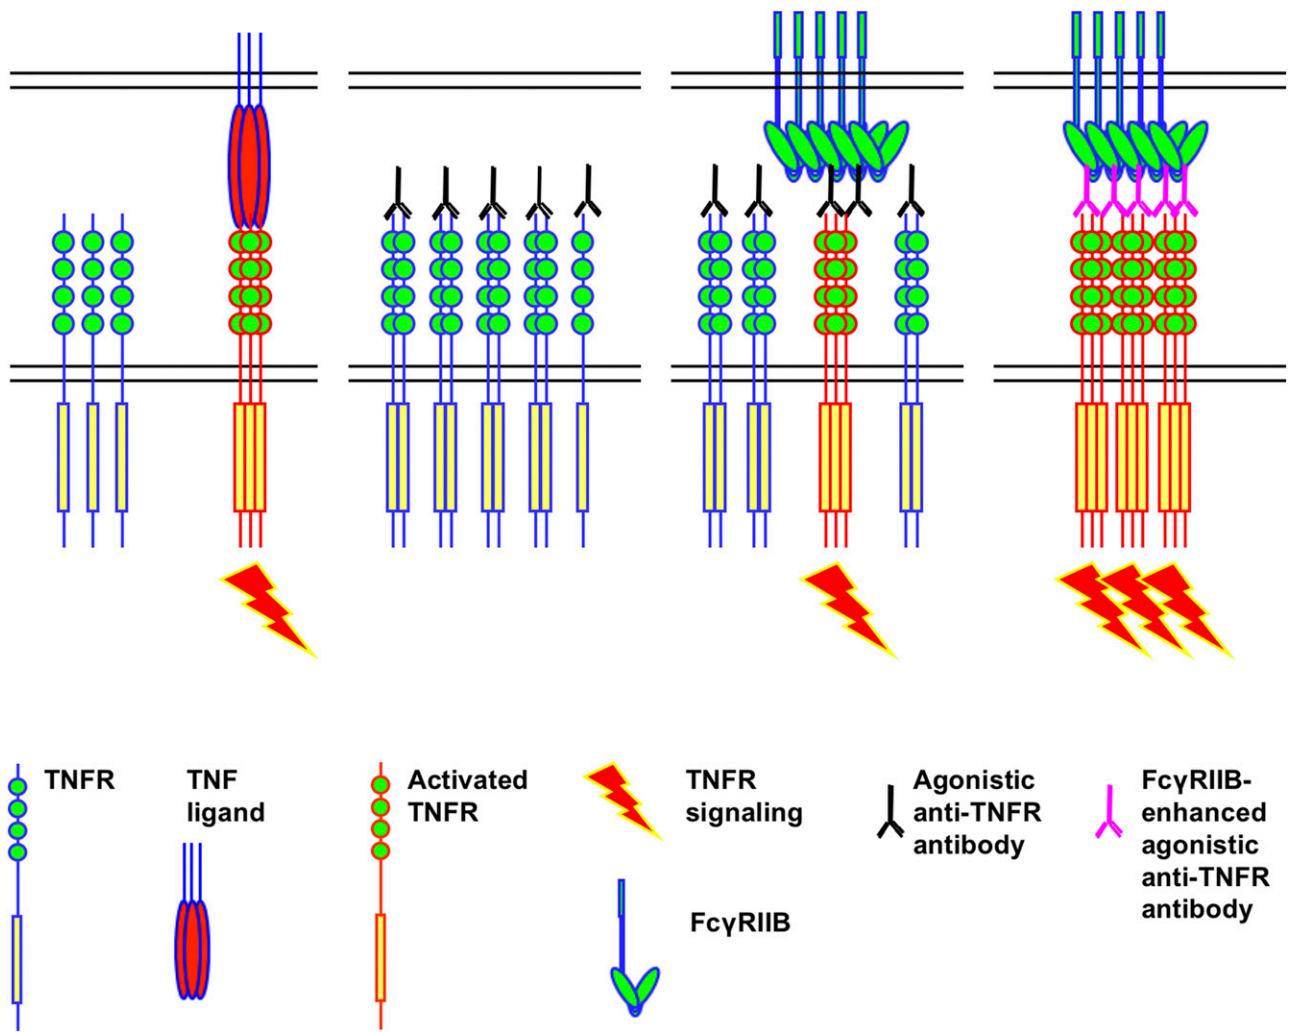

**Fig. S5.** Model of Fc $\gamma$ RIIB-dependent activation of agonistic anti-TNF receptor (TNFR) antibodies. Endogenous multimeric TNF ligands can cluster TNFRs to trigger their downstream signaling. In the absence of Fc $\gamma$ RIIB, clustering of TNFRs by the two arms of each single agonistic anti-TNFR antibody is insufficient to mimic the effect of multimeric TNF ligands. In contrast, agonistic anti-TNFR antibodies binding to TNFRs can be cross-linked by Fc $\gamma$ RIIB *in vivo*, and result in effective TNFR clustering and activation, mimicking the effect of endogenous multimeric TNF ligands. In addition, when agonistic anti-TNFR antibodies are optimized for Fc $\gamma$ RIIB binding, they can be more extensively cross-linked by Fc $\gamma$ RIIB, and result in enhanced TNFR clustering and activation.
